# Supplementary material for: Effective Healing of Staphylococcus aureus-Infected Wounds in Pig Cathelicidin Protegrin-1-Overexpressing Transgenic Mice
Source: MDPI journal article supplement (doi:10.3390/ijms241411658), 2023-07-19
Supplement: s1 [file s1]

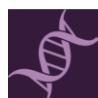

Supplementary Materials

# Effective Healing of *Staphylococcus aureus*-Infected Wounds in Pig Cathelicidin Protegrin-1-Overexpressing Transgenic Mice

Nagasundarapandian Soundrarajan, Prathap Somasundaram, Dohun Kim, Hye-Sun Cho, Hyoim Jeon, Byeonyong Ahn, Mingue Kang, Hyuk Song and Chankyu Park \*

Department of Stem Cells and Regenerative Biology, Konkuk University, Hwayang-dong, Seoul 05029, Republic of Korea; sundarmeets@gmail.com (N.S.); prathaparunms@gmail.com (P.S.); kdh2136@konkuk.ac.kr (D.K.); chssky77@gmail.com (H.-S.C.); kamuijhi@naver.com (H.J.); anhbyeongyong1123@gmail.com (B.A.); mingue5349@gmail.com (M.K.); songh@konkuk.ac.kr (H.S.)

\* Correspondence: chankyu@konkuk.ac.kr; Tel.: +82-2-450-3697; Fax: +82-2-450-0686

**Table S1.** Evaluation of minimum inhibitory concentration of recombinant PG1.

| Strains                                | PG1 (µg/mL) | Gentamycin (µg/mL) |
|----------------------------------------|-------------|--------------------|
| <i>Staphylococcus aureus</i> ATCC 6538 | 4           | 2                  |
| <i>Escherichia coli</i> ATCC 25922     | 6           | 1                  |

**Table S2.** Primers used in the Real-time quantitative PCR.

| Name    | Primer Sequence (5' to 3') | Species Amplified |
|---------|----------------------------|-------------------|
| IL-6-F  | TACCACTTCACAAGTCGGAGGC     | Mouse             |
| IL-6-R  | CTGCAAGTGCATCATCGTTGTTC    | Mouse             |
| TNFα-F  | GCCTCTTCTCATTCCTGCTTG      | Mouse             |
| TNFα-R  | CTGATGAGAGGGAGGCCATT       | Mouse             |
| GAPDH-F | GTGAAGGTCGGTGTGAACGGATT    | Mouse             |
| GAPDH-R | GGAGATGATGACCCTTTTGGCTC    | Mouse             |

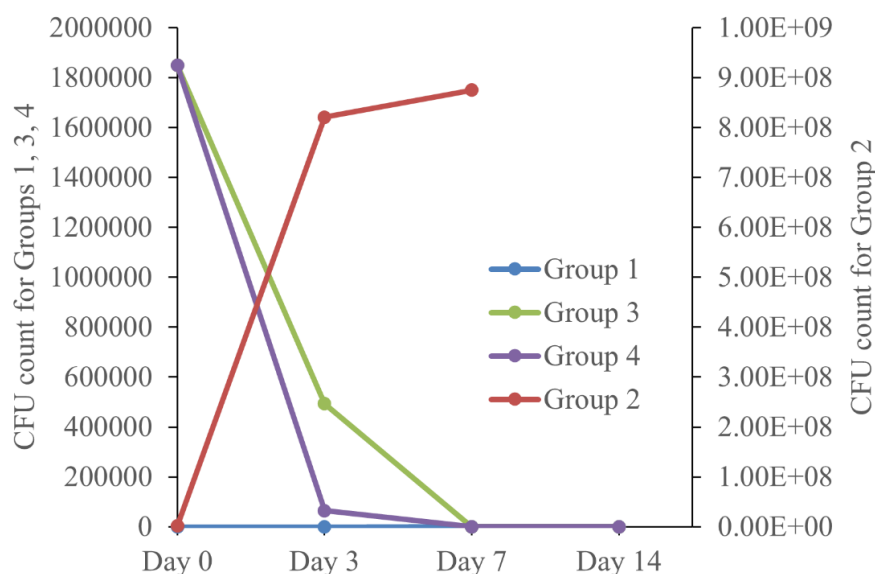

**Figure S1.** Estimation of bacterial loads in wound biopsy. Five mice per group were used to estimate the colony forming unit (CFU)/gram wound biopsy tissue. Group 1; PG1 Tg mice without infection, Group 2; wildtype mice with infection, Group 3; wildtype mice with infection and treated with gentamycin, and Group 4; PG1 Tg mice with infection. Both Group 3 and 4 showed significant

reduction of bacterial count on day 7 and 14. Group 2 to 4 were infected with  $1.0 \times 10^6$  CFU of *S. aureus*.

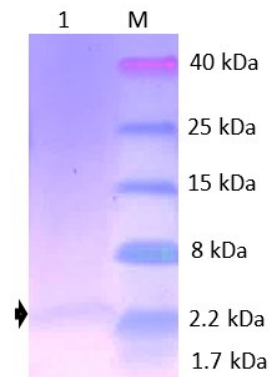

**Figure S2. Recombinant PG1 purified by RP-HPLC.** Lane 1: Recombinant PG1 purified by RP-HPLC analyzed by 16% Tris-tricine SDS-PAGE. The target band corresponding to PG1 is indicated by an arrow. Lane M, low-molecular-weight marker (Lane M). The PG1 purity was > 95% according to SDS-PAGE.
